# Supplementary material for: Aggregation-induced emission photosensitizer microneedles for enhanced melanoma photodynamic therapy
Source: Royal Society of Chemistry journal article supplement (doi:10.1039/d3bm01819a), 2024-01-01
Supplement: d3bm01819a1.pdf [file d3bm01819a1.pdf]

## Supporting information

### **Aggregation-induced emission photosensitizers microneedles for enhanced melanoma photodynamic therapy**

Ling Liang <sup>a,b,c,1</sup>, Tuokai Peng <sup>a,d,1</sup>, Xin Yao Geng <sup>b,c</sup>, Wenping Zhu <sup>a,d</sup>,  
Chaoyong Liu <sup>a,e\*</sup>, Hui-Qing Peng <sup>a,d,f\*</sup>, Bo Zhi Chen <sup>b,c\*</sup>, Xin Dong Guo <sup>b,c\*</sup>

<sup>a</sup> *Beijing Advanced Innovation Center for Soft Matter Science and Engineering, Beijing University of Chemical Technology, Beijing 100029, China*

<sup>b</sup> *State Key Laboratory of Organic-Inorganic Composites, Beijing University of Chemical Technology, Beijing 100029, China*

<sup>c</sup> *Beijing Laboratory of Biomedical Materials, College of Materials Science and Engineering, Beijing University of Chemical Technology, Beijing, 100029, China*

<sup>d</sup> *State Key Laboratory of Chemical Resource Engineering, Beijing University of Chemical Technology, Beijing 100029, China*

<sup>e</sup> *College of Life Science and Technology, Beijing University of Chemical Technology, Beijing 100029, China*

<sup>f</sup> *Guangdong Provincial Key Laboratory of Luminescence from Molecular Aggregates, South China University of Technology, Guangzhou 510640, China*

\* Corresponding authors:

[xdguo@buct.edu.cn](mailto:xdguo@buct.edu.cn) (Guo, XD),

[chenbz@buct.edu.cn](mailto:chenbz@buct.edu.cn) (Chen, BZ),

[hqpeng@mail.buct.edu.cn](mailto:hqpeng@mail.buct.edu.cn) (Peng, H-Q)

[chaoyongliu@mail.buct.edu.cn](mailto:chaoyongliu@mail.buct.edu.cn) (Liu, CY)

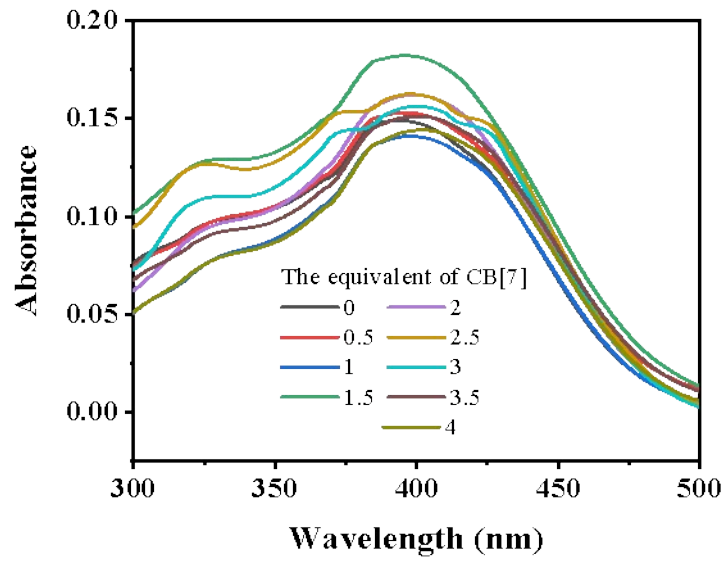

**Fig. S1** The absorption spectra of (E)-TPE-EPy (10  $\mu$ M) with different equivalent of CB[7] in water.

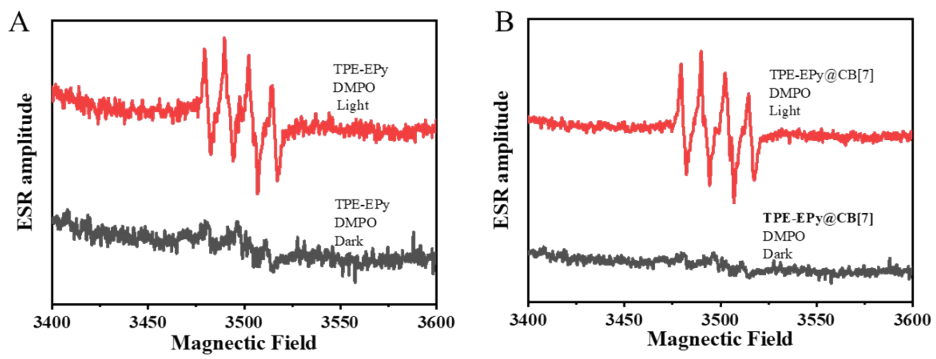

**Fig. S2** ESR spectra to detect ROS generation from TPE-EPy (A) and TPE-EPy@CB[7], (B) under irradiation, using DMPO as the spin trapper.

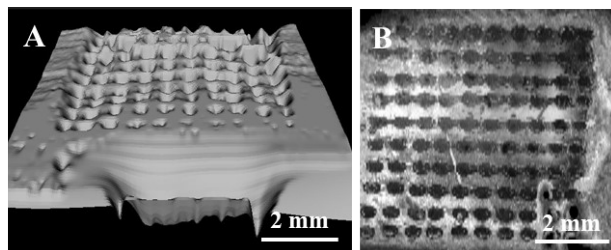

**Fig. S3** The OCT images of the mice skin after MNs penetration. (A) OCT image of the mice skin surface. (B) OCT image of the cross section at 100  $\mu$ m from the skin surface.

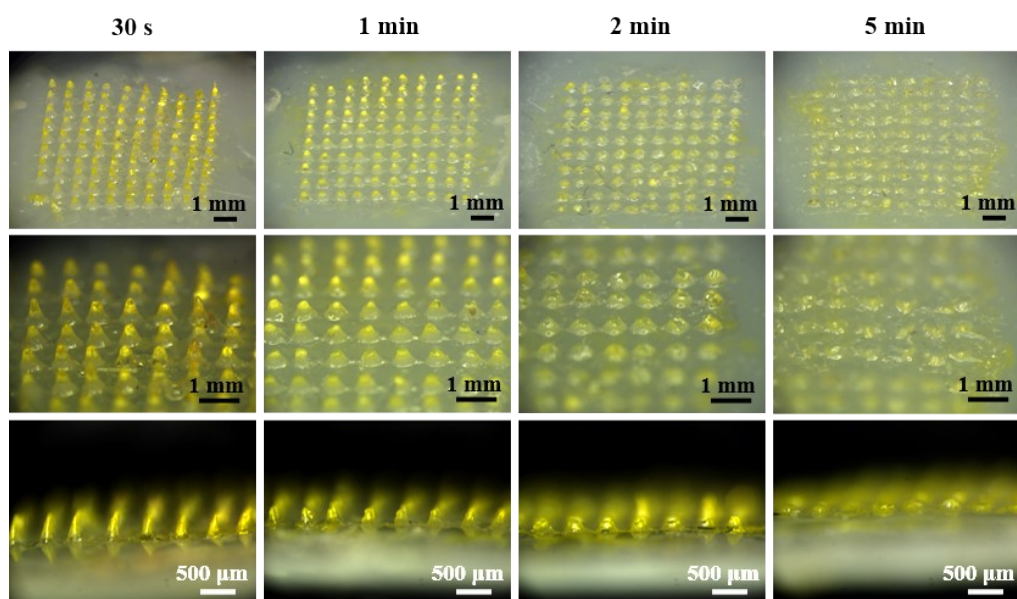

**Fig. S4** The dissolution of MNs inserting into the dorsal skin of mice at different times (30 s, 1, 2, 5 min).

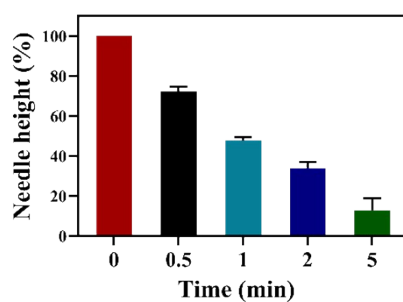

**Fig. S5** Height change of MNs piercing into the dorsal skin of mice for 0, 0.5, 1, 2, 5 min.

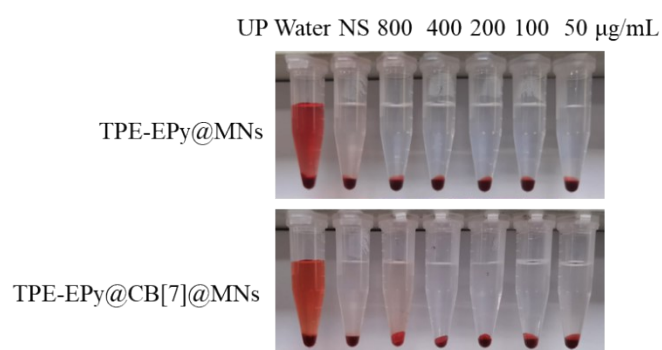

**Fig. S6** Hemolysis assay results images of the TPE-EPy@MNs and TPE-EPy@CB[7]@MNs.
